# Supplementary material
Source: Elsevier journal article supplement (https://www.sciencedirect.com/science/article/pii/S2254887422000765)
Supplement: mmc1 [file S2254887422000765:mmc1.pdf]

---

**HEART FAILURE KNOWLEDGE EVALUATION QUESTIONNAIRE (CECIC)**

---

NAME:

DATE:

Test. Num.: 0 (discharge) / 1 (Individual) / 2 (group) / 3 (reinforcement) / ... (...)

---

**-----Disease knowledge**

---

1. You have been informed that you have HEART FAILURE. This means that:

- a) The heart is larger than the ribcage and it is squishing the lungs.
  - b) The heart cannot pump the amount of blood that the body needs.
  - c) The kidneys do not eliminate enough fluid, causing swelling.
  - d) The problem is that the lungs are not working properly.
- 

2. What are the main CAUSES of heart failure?

- a) Heart attack, high blood pressure, and some familial predisposition.
  - b) Lung problems and allergies.
  - c) Obesity and diabetes.
  - d) Poorly treated colds.
- 

3. With heart failure, it can be DIFFICULT TO BREATHE due to:

- a) Excess fluid in the lungs ("wet lungs").
  - b) Because the bronchi are not healthy.
  - c) Being nervous and having anxiety.
  - d) Not getting sufficient rest.
- 

4. What do you think is the MAIN DECOMPENSATING FACTOR of heart failure which should put us on alert?

- a) A high-fat diet.
  - b) A cold or the flu.
  - c) Lack of exercise.
  - d) Regularly taking heart medicine.
-

---

## Warning signs

---

5. How often do you CHECK YOUR WEIGHT?

- a) Weekly to ensure I'm not getting overweight.
  - b) Occasionally, because I always weigh the same.
  - c) Everyday, before getting dressed, in case I retain fluids.
  - d) I don't weigh myself because I don't think it is important.
- 

6. Which of the following situations IS NOT ASSOCIATED with CARDIAC DECOMPENSATION?

- a) Swelling of the feet and legs.
  - b) Weight loss.
  - c) Increased coughing and difficulty breathing when lying down.
  - d) General discomfort and tiredness.
- 

7. How often do you check your BLOOD PRESSURE and HEART RATE?

- a) A few days before the appointment, for the doctor to see it.
  - b) Rarely, it's always fine.
  - c) Everyday and multiple times as I've been told to do.
  - d) Regularly to check the effect of my medication.
- 

8. Which of the following situations WARN of a possible decompensation?

- a) Systolic blood pressure ("the high one") between 100 and 140 mmHg.
  - b) Heart rate between 50 and 100 bpm.
  - c) Weight gain of 1 kilo per day or 2 kilos in 2 or 3 consecutive days.
  - d) Diastolic blood pressure ("the low one") below 60 mmHg.
- 

9. What is the BEST THING to do if warning signs of decompensation appear?

- a) Call the doctor or nursing staff.
  - b) Wait until the next appointment.
  - c) Take less medication.
  - d) Go to the emergency department as soon as possible, even if the decompensation is mild.
-

---

## Diet

---

10. Regarding DAILY FLUID INTAKE (juice, soup, water):

- a) Abundant fluid intake is good as it protects the kidneys.
  - b) I drink very little to prevent retaining fluids.
  - c) I don't keep track because I don't think it is important.
  - d) It is advisable to moderate fluid intake at 1.5 to 2.5 litres maximum.
- 

11. In a HEART-HEALTHY DIET that is low in fat and salt, it is useful to:

- a) Buy prepared food and canned goods as they are healthier.
  - b) Replace normal salt with other sodium-free salt types.
  - c) Consume cured meats, butter and margarine with salt in moderation.
  - d) Increase your fruit, vegetable and legume intake.
- 

12. Which of these behaviours is HARMFUL to your heart?

- a) Avoiding consuming alcohol, coffee and fizzy drinks.
  - b) Eliminating tobacco.
  - c) Not controlling excess weight.
  - c) Getting regular exercise such as walking, swimming and bicycling.
- 

13. Why should someone with heart failure follow a low-salt diet?

- a) Salt promotes fluid retention.
  - b) Salt causes constriction of the blood vessels.
  - c) Salt increases heart rate.
  - d) Salt interferes with the action of medications.
- 

---

## Exercise

---

14. PHYSICAL EXERCISE such as walking, swimming or gentle cycling can cause all the following effects EXCEPT:

- a) Aggravate disease symptoms.
  - b) Help with weight loss.
  - c) Help lower cholesterol levels.
  - d) Improve muscle strength.
-

---

15. Which of the following IS NOT APPROPRIATE when doing EXERCISE?

- a) Starting to exercise progressively with activities that are comfortable.
  - b) Exercising in extreme temperatures.
  - c) Getting at least 30 minutes of exercise every day, most days of the week.
  - d) Drinking water before and after exercising.
- 

-----**Treatment**

---

16. If you gain more than 1 kg of weight in one day or 2 kg in 2 or 3 days, YOU SHOULD:

- a) Eat less for a few days.
  - b) Increase my fluid intake.
  - c) Take fewer water tablets (diuretics).
  - c) Take more water tablets (diuretics).
- 

---

17. Which heart medications CAN LOWER BLOOD PRESSURE?

- a) Water tablets (diuretics): furosemide, eplerenone, spironolactone.
  - b) Tablets that slow the heart (beta blockers): bisoprolol, carvedilol, nebivolol.
  - c) Tablets to regulate blood pressure (ACEIs or ARB-II): ramipril, enalapril, losartan, valsartan, sacubitril ...
  - d) All of the above.
- 

---

18. The medications you take for your heart HELP do all the following, EXCEPT:

- a) Reduce physical fatigue and improve breathing and tissue blood flow.
  - b) Reduce the likelihood of being admitted to hospital.
  - c) Prevent weight gain.
  - d) Make you live longer.
-

---

19. The idea that patients must be RESPONSIBLE FOR THEIR CARE means all of the following EXCEPT:

- a) Knowing their medication and taking it daily.
  - b) Following a healthy lifestyle: diet, exercise, no tobacco...
  - c) Contacting their doctor or nurse when they notice their health is declining.
  - d) When they feel better, stop taking their heart failure medication.
- 

20. Which of the following statements is INCORRECT?

- a) Heart failure is a chronic disease, meaning you will go through periods of feeling better and others of feeling worse.
  - b) The doses of some medications may be increased, even if you feel fine, because it is the appropriate treatment for you.
  - c) Medications can cause side effects, particularly in the beginning, so you should report these to your care team.
  - d) You do not need to provide your medication or blood pressure and pulse readings every visit because they are already in your reports.
- 

21. Of the following drug groups, all have been shown to extend life and improve heart function EXCEPT FOR:

- a) diuretics: furosemide, torsemide, chlorthalidone, hydrochlorothiazide...
- b) ACEI/ARB-II/ARNI: ramipril, enalapril, candesartan, losartan, sacubitril-valsartan...
- c) beta blockers: carvedilol, bisoprolol, nebivolol, metoprolol...
- d) anti-aldosterone drugs: spironolactone, eplerenone...
